# Supplementary material
Source: publisher site journal article supplement (https://www.dovepress.com/get_supplementary_file.php?f=462234.docx)
Supplement: Supplementary file 1 [file get_supplementary_file.php]

**Supplementary file1**

**
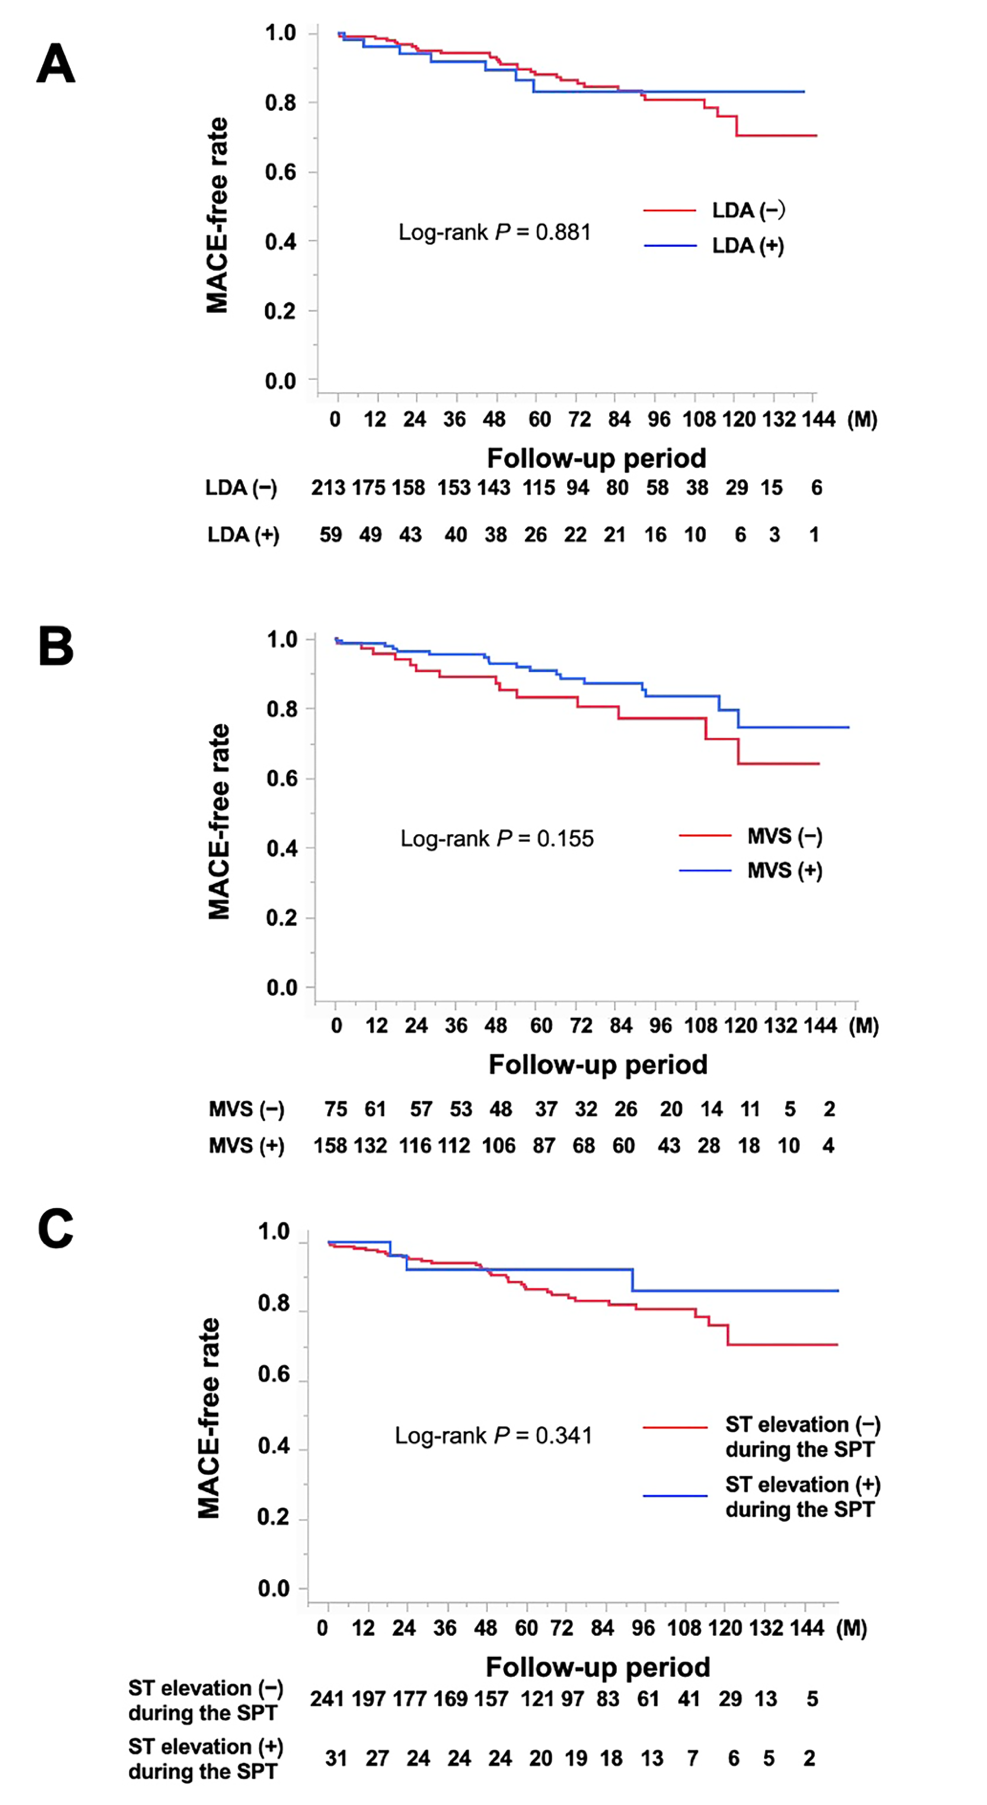
**

Kaplan–Meier curve for MACE-free survival during the follow-up period: influence of **(A)** spasm induction by LDA **(B)** MVS **(C)** ST elevation during the SPT.

**Abbreviations**: DM, diabetes mellitus; LDA: low dose of acetylcholine; M, months; MACE, major adverse cardiovascular event; MVS: multivessel spasm; SPT: spasm provocation test.

**Notes**: **(A)** The presence of LDA-induced spasm did not significantly affect MACE (*P* = 0.881). **(B)** The presence of MVS did not significantly affect MACE (*P* = 0.155). **(C)** The presence of ST elevation during the SPT did not significantly affect MACE (*P* = 0.341).
